# Supplementary material
Source: Springer Nature journal article supplement (https://www.springermedizin.de/resource/supplementary/12936_2010_1747_MOESM5_ESM.pdf/9541602)

# Bilayer tablet long-term stability study

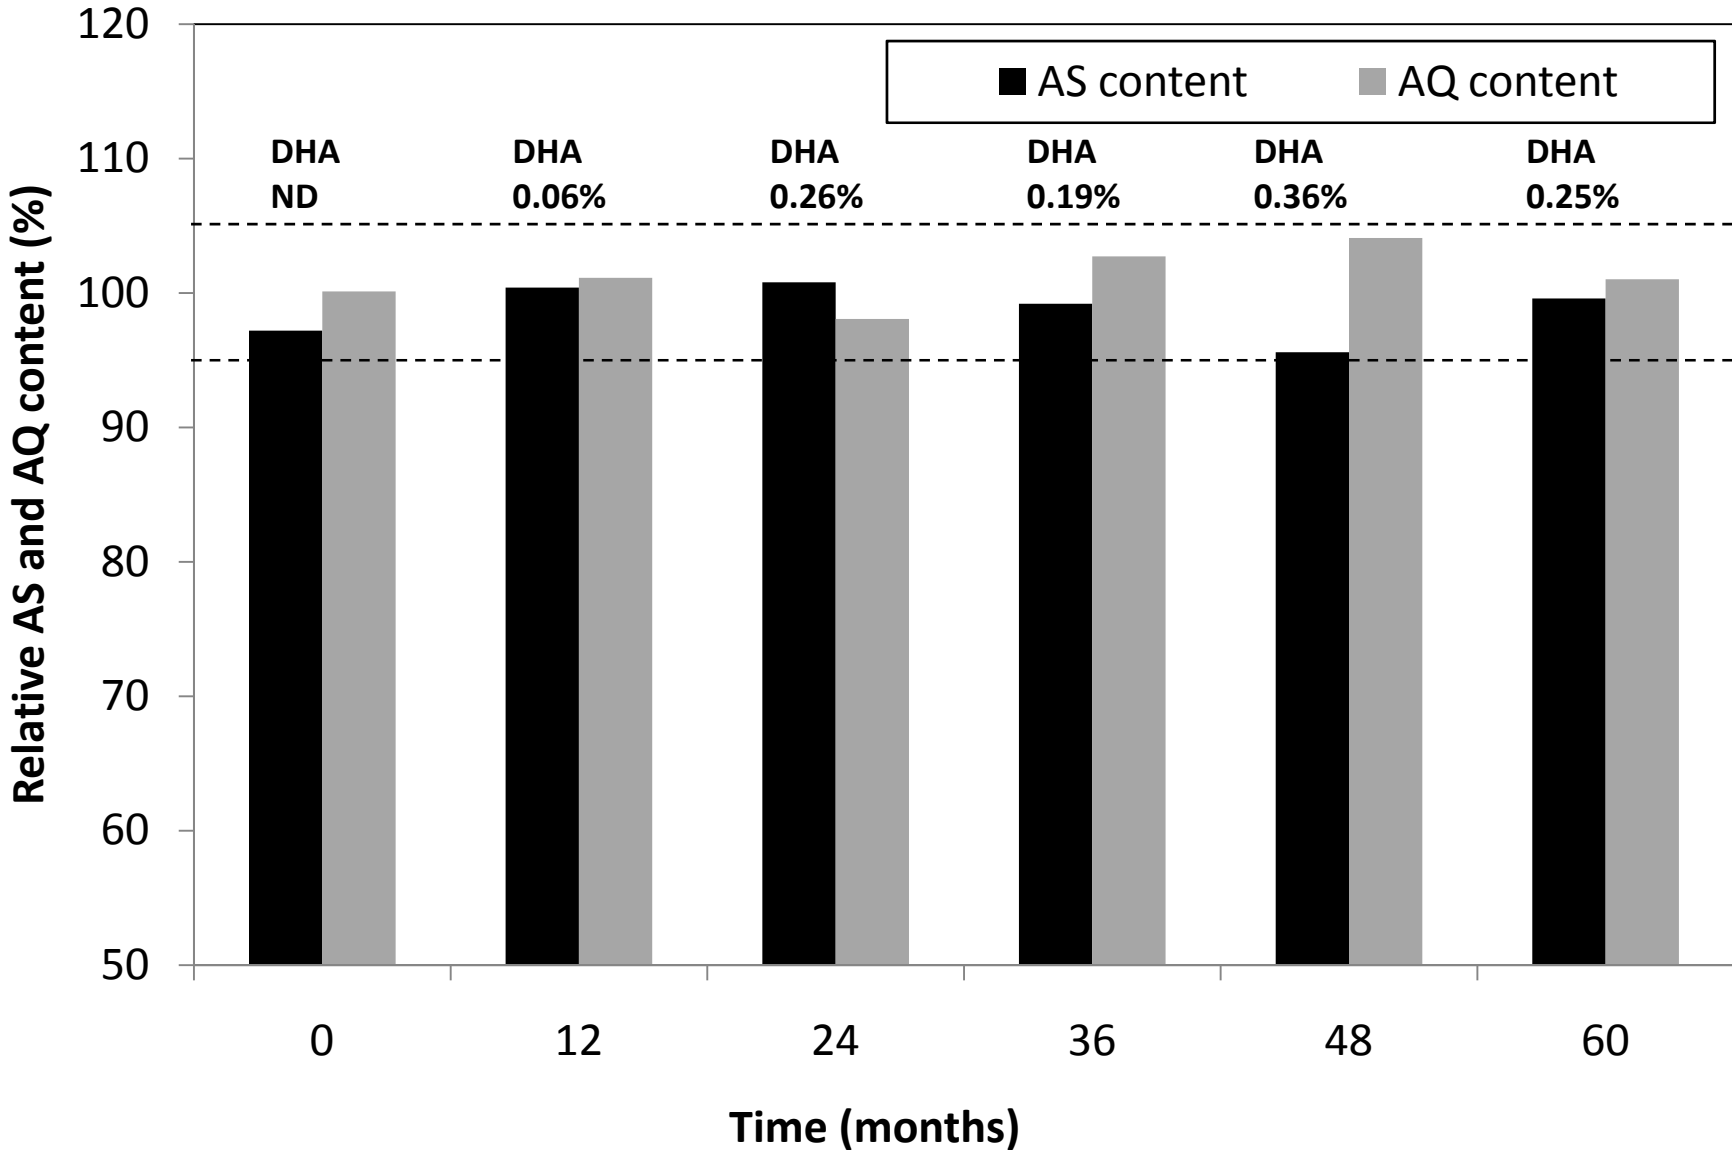

Supplement: MOESM5 [file 9541602]
